# Supplementary material for: Reservoir-Style Polymeric Drug Delivery Systems: Empirical and Predictive Models for Implant Design
Source: MDPI journal article supplement (doi:10.3390/ph15101226), 2022-10-03
Supplement: s1 [file s1]

## **Supplementary Materials: Reservoir-Style Polymeric Drug Delivery Systems: Empirical and Predictive Models for Implant Design**

Linying Li<sup>1</sup>, Chanhwa Lee<sup>2</sup>, Daniela F. Cruz<sup>1</sup>, Sai Archana Krovi<sup>1</sup>, Michael G. Hudgens<sup>2</sup>,  
Mackenzie L. Cottrell<sup>3</sup>, Leah M. Johnson<sup>1\*</sup>

<sup>1</sup> RTI International, 3040 E. Cornwallis Road, Research Triangle Park, NC 27709

<sup>2</sup> Dept of Biostatistics, Gillings School of Global Public Health, University of North Carolina,  
Chapel Hill, NC 27599

<sup>3</sup> Division of Pharmacotherapy and Experimental Therapeutics, Eshelman School of Pharmacy,  
University of North Carolina, Chapel Hill, NC 27599

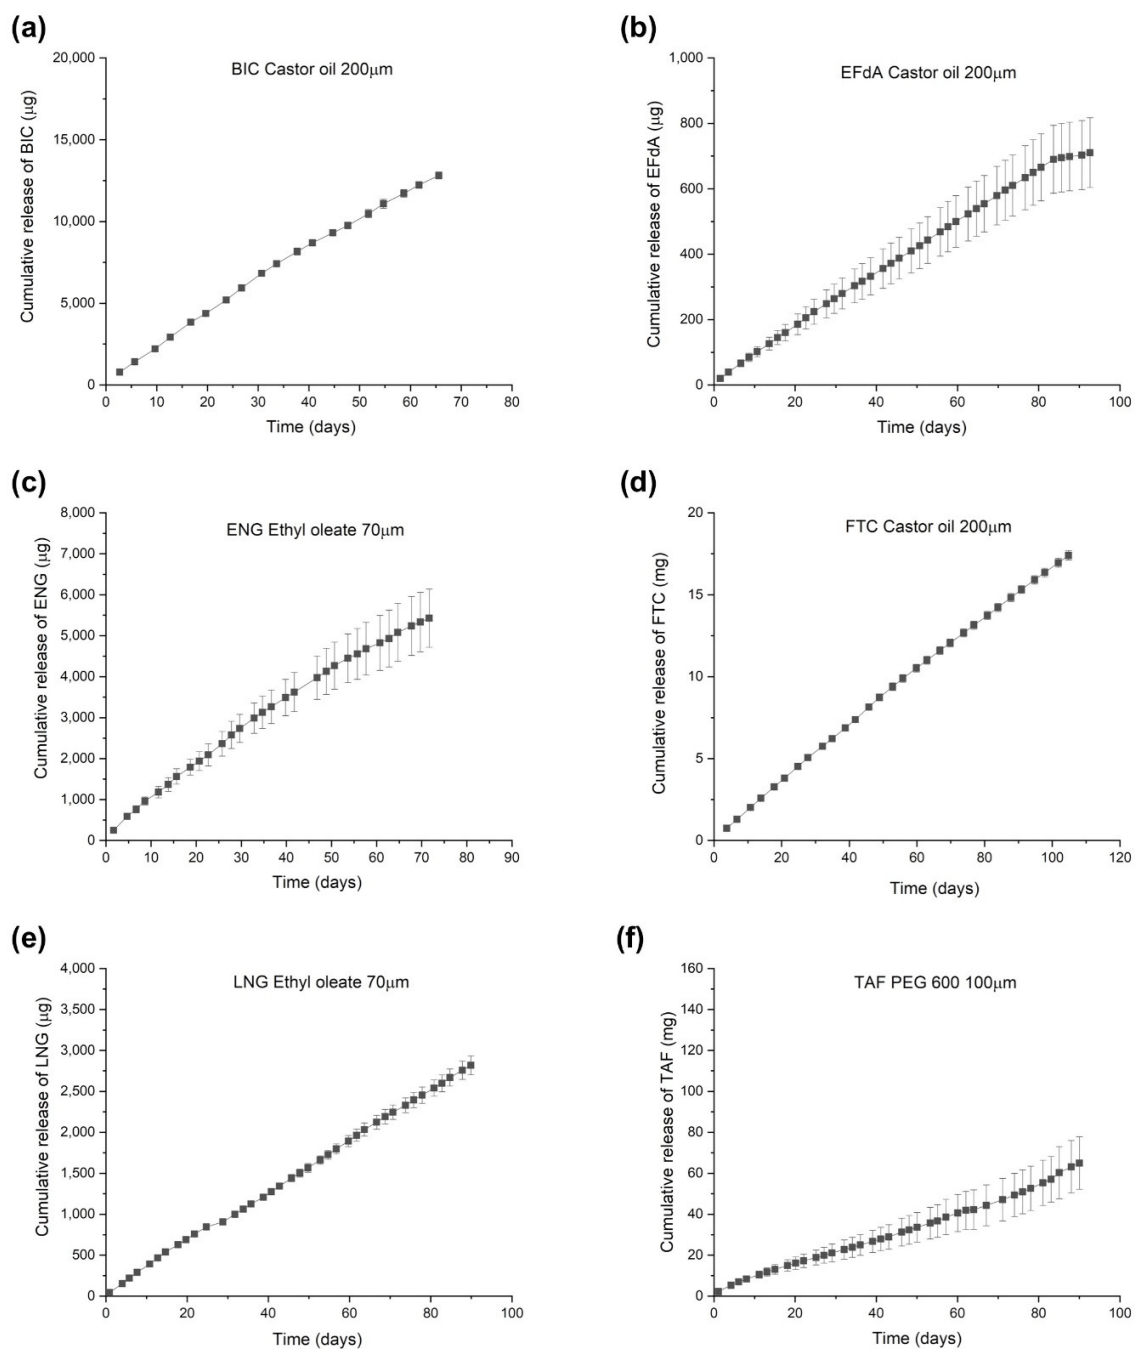

**Figure S1.** Cumulative release profiles of active pharmaceutical ingredients (APIs) from PCL implants with different configurations: (a) BIC (castor oil, PC-17, 40 mm length, 200  $\mu$ m wall thickness, drug to excipient ratio: 2:1), (b) EFdA (castor oil, PC-17, 10 mm length, 200  $\mu$ m wall thickness, drug to excipient ratio: 1:1), (c) ENG (ethyl oleate, Sigma, 10 mm length, 70  $\mu$ m wall

thickness, drug to excipient ratio: 2:1), (d) FTC (castor oil, PC-17, 40 mm length, 200  $\mu\text{m}$  wall thickness, drug to excipient ratio: 1:1), (e) LNG (ethyl oleate, Sigma, 10 mm length, 70  $\mu\text{m}$  wall thickness, drug to excipient ratio: 2:1), and (f) TAF<sub>salt</sub> (PEG 600, Sigma, 40 mm length, 100  $\mu\text{m}$  wall thickness, drug to excipient ratio: 2:1).

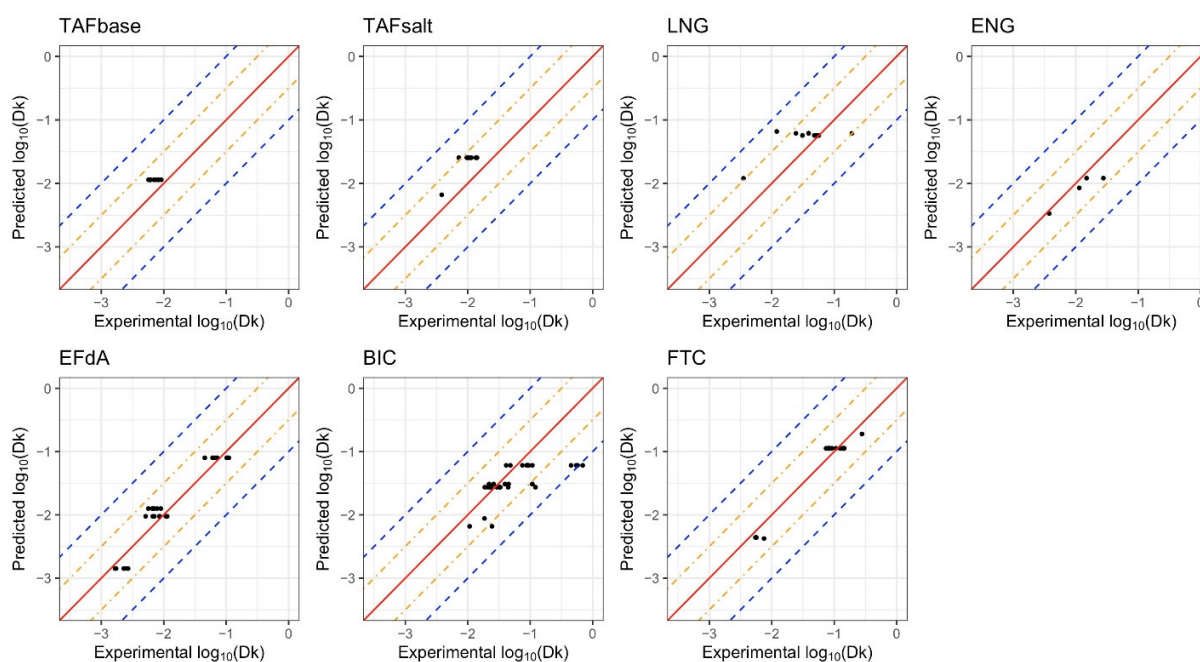

**Figure S2.** Predicted and experimental values of  $\log_{10}(Dk)$  by API. The solid red diagonal line indicates when the prediction and observation are the same, the orange and blue dashed lines indicate predictive values within 0.5 log and 1 log of the observed values, respectively.

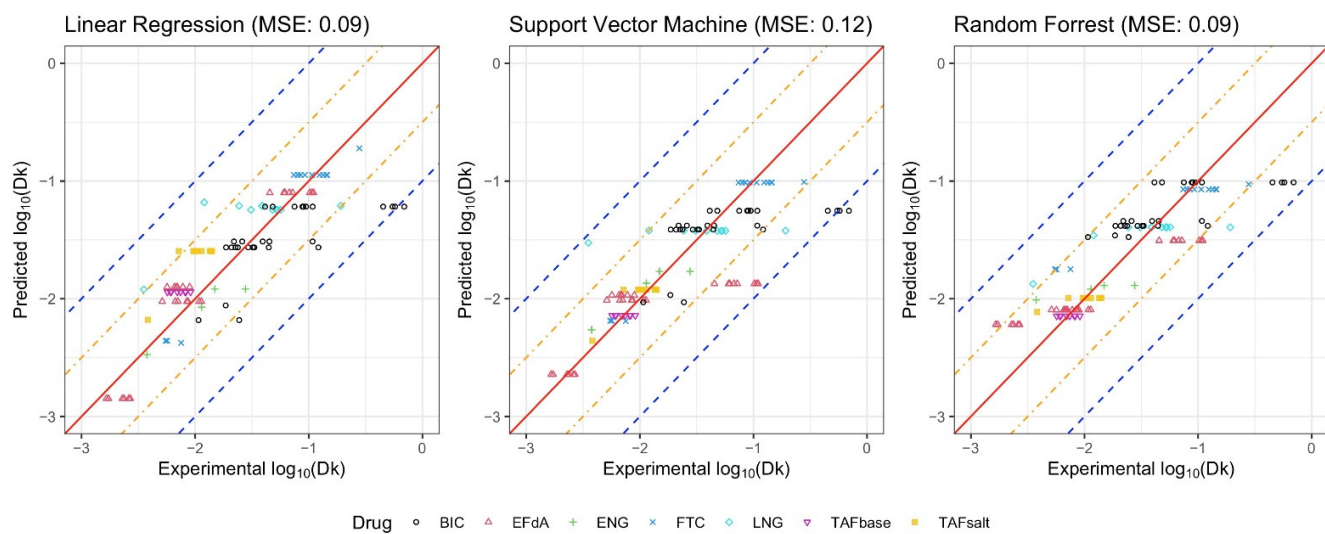

**Figure S3.** Comparison of the linear prediction model and machine learning models. The solid red diagonal line indicates when the prediction and observation are the same, the orange and blue dashed lines indicate predictive values within 0.5 log and 1 log of the observed values, respectively.

**Table S1.** The predicted and experimental values for  $Dk$  and daily release rates for the implants containing different drug formulations.

| API                 | Excipients       | PCL type | PCL wall thickness ( $\mu\text{m}$ ) | Length of the implant (mm) | Experimental $Dk$ ( $\text{mm}^2/\text{day}$ ) | Predicted $Dk$ ( $\text{mm}^2/\text{day}$ ) | Experimental release rate ( $\text{mg}/\text{day}$ ) | Predicted release rate ( $\text{mg}/\text{day}$ ) |
|---------------------|------------------|----------|--------------------------------------|----------------------------|------------------------------------------------|---------------------------------------------|------------------------------------------------------|---------------------------------------------------|
| TAF <sub>salt</sub> | Castor oil       | Sigma    | 70                                   | 40                         | 1.41E-02                                       | 1.83E-02                                    | 0.75                                                 | 1.016                                             |
|                     |                  | Sigma    | 100                                  | 40                         | 1.14E-02                                       | 1.83E-02                                    | 0.43                                                 | 0.711                                             |
|                     |                  | Sigma    | 200                                  | 40                         | 1.05E-02                                       | 1.83E-02                                    | 0.19                                                 | 0.355                                             |
|                     |                  | Sigma    | 70                                   | 40                         | 1.37E-02                                       | 1.83E-02                                    | 0.74                                                 | 1.016                                             |
|                     |                  | Sigma    | 70                                   | 40                         | 1.35E-02                                       | 1.83E-02                                    | 0.72                                                 | 1.016                                             |
|                     |                  | Sigma    | 100                                  | 40                         | 9.65E-03                                       | 1.83E-02                                    | 0.36                                                 | 0.711                                             |
|                     |                  | Sigma    | 100                                  | 40                         | 7.19E-03                                       | 1.83E-02                                    | 0.26                                                 | 0.711                                             |
|                     | PEG 600          | Sigma    | 100                                  | 40                         | 3.83E-03                                       | 4.54E-03                                    | 0.64                                                 | 0.821                                             |
|                     | Castor oil       | Sigma    | 100                                  | 40                         | 9.98E-03                                       | 1.83E-02                                    | 0.16                                                 | 0.711                                             |
| TAF <sub>base</sub> | Castor oil       | Sigma    | 100                                  | 40                         | 6.15E-03                                       | 1.63E-02                                    | 0.24                                                 | 0.845                                             |
|                     |                  | Sigma    | 150                                  | 40                         | 6.97E-03                                       | 1.63E-02                                    | 0.17                                                 | 0.564                                             |
|                     |                  | Sigma    | 200                                  | 40                         | 7.42E-03                                       | 1.63E-02                                    | 0.14                                                 | 0.423                                             |
|                     |                  | Sigma    | 45                                   | 40                         | 9.11E-03                                       | 1.63E-02                                    | 0.78                                                 | 1.879                                             |
|                     |                  | Sigma    | 70                                   | 40                         | 8.28E-03                                       | 1.63E-02                                    | 0.44                                                 | 1.208                                             |
|                     |                  | PC-17    | 150                                  | 40                         | 8.15E-03                                       | 1.63E-02                                    | 0.27                                                 | 1.208                                             |
|                     |                  | PC-17    | 300                                  | 40                         | 5.70E-03                                       | 1.63E-02                                    | 0.09                                                 | 0.564                                             |
| LNG                 | Ethyl Oleate     | Sigma    | 70                                   | 10                         | 4.81E-02                                       | 4.81E-02                                    | 0.031                                                | 0.282                                             |
|                     | Sesame Oil       | Sigma    | 70                                   | 10                         | 3.91E-02                                       | 5.22E-02                                    | 0.023                                                | 0.032                                             |
|                     | Oleic Acid       | Sigma    | 70                                   | 10                         | 1.20E-02                                       | 5.59E-02                                    | 0.007                                                | 0.032                                             |
|                     | Propylene glycol | Sigma    | 70                                   | 10                         | 3.53E-03                                       | 9.61E-03                                    | 0.013                                                | 0.031                                             |
|                     | Ethyl Oleate     | PC-12    | 70                                   | 10                         | 3.10E-02                                       | 4.81E-02                                    | 0.021                                                | 0.038                                             |
|                     | Sesame oil       | PC-12    | 70                                   | 10                         | 2.44E-02                                       | 5.22E-02                                    | 0.015                                                | 0.032                                             |
|                     | Sesame oil       | PC-17    | 150                                  | 25                         | 3.87E-02                                       | 5.22E-02                                    | 0.027                                                | 0.032                                             |
|                     | Ethyl oleate     | PC-17    | 100                                  | 13                         | 5.29E-02                                       | 4.81E-02                                    | 0.032                                                | 0.037                                             |
|                     | Ethyl oleate     | PC-17    | 150                                  | 17                         | 5.67E-02                                       | 4.81E-02                                    | 0.029                                                | 0.029                                             |
|                     | Ethyl oleate     | PC-17    | 200                                  | 20                         | 5.21E-02                                       | 4.81E-02                                    | 0.024                                                | 0.025                                             |
|                     | Sesame oil       | PC-17    | 300                                  | 12                         | 1.92E-01                                       | 5.22E-02                                    | 0.030                                                | 0.022                                             |
| ENG                 | Ethyl oleate     | Sigma    | 70                                   | 10                         | 1.14E-02                                       | 1.12E-02                                    | 0.071                                                | 0.009                                             |
|                     | Sesame oil       | Sigma    | 70                                   | 10                         | 1.49E-02                                       | 1.61E-02                                    | 0.061                                                | 0.070                                             |
|                     | Castor oil       | Sigma    | 70                                   | 10                         | 3.76E-03                                       | 4.27E-03                                    | 0.067                                                | 0.068                                             |
|                     | Sesame oil       | PC-17    | 300                                  | 12                         | 2.77E-02                                       | 1.61E-02                                    | 0.030                                                | 0.078                                             |
|                     | Sesame oil       | PC-17    | 100                                  | 10                         | 1.10E-01                                       | 8.34E-02                                    | 0.0191                                               | 0.019                                             |
| EFdA                | Sesame oil       | PC-17    | 150                                  | 10                         | 6.18E-02                                       | 8.34E-02                                    | 0.0068                                               | 0.014                                             |
|                     | Sesame oil       | PC-17    | 200                                  | 10                         | 7.20E-02                                       | 8.34E-02                                    | 0.0059                                               | 0.010                                             |
|                     | Castor oil       | PC-17    | 100                                  | 10                         | 1.08E-02                                       | 9.21E-03                                    | 0.0212                                               | 0.007                                             |

|     |                      |       |     |    |          |          |        |       |
|-----|----------------------|-------|-----|----|----------|----------|--------|-------|
|     | Castor oil           | PC-17 | 150 | 10 | 7.05E-03 | 9.21E-03 | 0.0089 | 0.018 |
|     | Castor oil           | PC-17 | 200 | 10 | 8.46E-03 | 9.21E-03 | 0.0078 | 0.012 |
|     | Sesame oil           | PC-17 | 100 | 10 | 1.02E-01 | 8.34E-02 | 0.0168 | 0.009 |
|     | Castor oil           | PC-17 | 100 | 10 | 1.13E-02 | 9.21E-03 | 0.0144 | 0.014 |
|     | Castor oil           | PC-17 | 150 | 10 | 6.68E-03 | 9.21E-03 | 0.0062 | 0.018 |
|     | Castor oil           | PC-17 | 200 | 10 | 8.64E-03 | 9.21E-03 | 0.0058 | 0.012 |
|     | Castor oil           | PC-17 | 300 | 10 | 5.13E-03 | 9.21E-03 | 0.0023 | 0.009 |
|     | Sesame oil           | PC-17 | 100 | 10 | 1.07E-01 | 8.34E-02 | 0.0173 | 0.006 |
|     | Sesame oil           | PC-17 | 150 | 10 | 6.05E-02 | 8.34E-02 | 0.0064 | 0.014 |
|     | Sesame oil           | PC-17 | 200 | 10 | 6.74E-02 | 8.34E-02 | 0.0052 | 0.010 |
|     | Sesame oil           | PC-17 | 300 | 10 | 4.54E-02 | 8.34E-02 | 0.0022 | 0.007 |
|     | Castor oil           | PC-31 | 150 | 10 | 6.83E-03 | 1.23E-02 | 0.0062 | 0.005 |
|     | Castor oil           | PC-31 | 200 | 10 | 6.57E-03 | 1.23E-02 | 0.0043 | 0.012 |
|     | Castor oil           | PC-41 | 150 | 10 | 7.80E-03 | 1.23E-02 | 0.0070 | 0.009 |
|     | Castor oil           | PC-41 | 200 | 10 | 5.67E-03 | 1.23E-02 | 0.0037 | 0.012 |
|     | Glycerol             | PC-31 | 150 | 10 | 2.29E-03 | 1.29E-03 | 0.0130 | 0.009 |
|     | Glycerol             | PC-31 | 200 | 10 | 2.61E-03 | 1.29E-03 | 0.0108 | 0.015 |
|     | Glycerol             | PC-41 | 150 | 10 | 1.66E-03 | 1.29E-03 | 0.0092 | 0.011 |
|     | Glycerol             | PC-41 | 200 | 10 | 1.73E-03 | 1.29E-03 | 0.0071 | 0.015 |
|     | Castor oil           | PC-31 | 300 | 10 | 8.95E-03 | 1.23E-02 | 0.0037 | 0.011 |
|     | Castor oil           | PC-41 | 300 | 10 | 6.97E-03 | 1.23E-02 | 0.0029 | 0.006 |
|     | Glycerol             | PC-31 | 300 | 10 | 2.68E-03 | 1.29E-03 | 0.0072 | 0.006 |
|     | Glycerol             | PC-41 | 300 | 10 | 2.37E-03 | 1.29E-03 | 0.0062 | 0.007 |
| BIC | Sesame oil           | PC-17 | 100 | 40 | 5.75E-01 | 6.49E-02 | 0.725  | 0.007 |
|     | Sesame oil           | PC-17 | 150 | 40 | 5.46E-01 | 6.49E-02 | 0.449  | 0.356 |
|     | Sesame oil           | PC-17 | 200 | 40 | 6.93E-01 | 6.49E-02 | 0.418  | 0.238 |
|     | Sesame oil           | PC-17 | 300 | 40 | 4.51E-01 | 6.49E-02 | 0.173  | 0.178 |
|     | Glycerol             | PC-17 | 100 | 40 | 1.08E-01 | 3.20E-02 | 0.629  | 0.119 |
|     | Castor oil           | PC-17 | 100 | 40 | 1.22E-01 | 2.84E-02 | 0.956  | 0.383 |
|     | PEG 40<br>Castor oil | PC-17 | 100 | 40 | 2.44E-02 | 6.51E-03 | 0.939  | 0.388 |
|     | Oleic acid           | PC-17 | 100 | 40 | 1.86E-02 | 8.77E-03 | 0.521  | 0.452 |
|     | Sesame oil           | PC-41 | 150 | 40 | 8.80E-02 | 6.49E-02 | 0.298  | 0.438 |
|     | Castor oil           | PC-41 | 150 | 40 | 3.32E-02 | 2.84E-02 | 0.287  | 0.238 |
|     | Sesame oil           | PC-41 | 200 | 40 | 8.93E-02 | 6.49E-02 | 0.224  | 0.259 |
|     | Castor oil           | PC-41 | 200 | 40 | 3.22E-02 | 2.84E-02 | 0.201  | 0.178 |
|     | Sesame oil           | PC-17 | 200 | 40 | 4.13E-02 | 6.49E-02 | 0.301  | 0.194 |
|     | Glycerol             | PC-31 | 150 | 40 | 3.94E-02 | 3.20E-02 | 0.296  | 0.178 |
|     | Castor oil           | PC-31 | 150 | 40 | 4.44E-02 | 2.84E-02 | 0.378  | 0.255 |
|     | PEG 40<br>Castor oil | PC-31 | 150 | 40 | 1.07E-02 | 6.51E-03 | 0.476  | 0.259 |
|     | Sesame oil           | PC-31 | 150 | 40 | 9.45E-02 | 6.49E-02 | 0.321  | 0.301 |
|     | Sesame oil           | PC-17 | 200 | 10 | 1.08E-01 | 6.49E-02 | 0.073  | 0.238 |
|     | Sesame oil           | PC-31 | 200 | 10 | 8.96E-02 | 6.49E-02 | 0.062  | 0.045 |
|     | Sesame oil           | PC-41 | 200 | 10 | 7.49E-02 | 6.49E-02 | 0.050  | 0.045 |
|     | Sesame oil           | PC-17 | 300 | 40 | 4.81E-02 | 6.49E-02 | 0.074  | 0.045 |

|     |                  |       |     |    |          |          |       |       |
|-----|------------------|-------|-----|----|----------|----------|-------|-------|
| FTC | Castor oil       | PC-17 | 300 | 40 | 1.87E-02 | 2.84E-02 | 0.070 | 0.119 |
|     | Castor oil       | PC-17 | 150 | 40 | 2.38E-02 | 2.84E-02 | 0.218 | 0.129 |
|     | Castor oil       | PC-17 | 200 | 40 | 2.93E-02 | 2.84E-02 | 0.191 | 0.259 |
|     | Castor oil       | PC-17 | 250 | 40 | 2.27E-02 | 2.84E-02 | 0.113 | 0.194 |
|     | Castor oil       | PC-17 | 300 | 40 | 2.09E-02 | 2.84E-02 | 0.084 | 0.155 |
|     | Glycerol         | PC-17 | 100 | 40 | 4.50E-02 | 3.20E-02 | 0.487 | 0.129 |
|     | Glycerol         | PC-17 | 200 | 40 | 2.60E-02 | 3.20E-02 | 0.136 | 0.383 |
|     | Glycerol         | PC-17 | 300 | 40 | 2.20E-02 | 3.20E-02 | 0.074 | 0.192 |
|     | Castor oil       | PC-17 | 100 | 40 | 1.45E-01 | 1.16E-01 | 0.40  | 0.128 |
|     | Castor oil       | PC-17 | 200 | 40 | 1.07E-01 | 1.16E-01 | 0.14  | 0.331 |
|     | Castor oil       | PC-17 | 300 | 40 | 7.40E-02 | 1.16E-01 | 0.06  | 0.166 |
|     | Glycerol         | PC-17 | 300 | 40 | 5.49E-03 | 4.04E-03 | 0.19  | 0.110 |
|     | Castor oil       | PC-31 | 150 | 40 | 8.45E-02 | 1.16E-01 | 0.19  | 0.156 |
|     | Oleic acid       | PC-31 | 150 | 40 | 2.79E-01 | 2.00E-01 | 0.36  | 0.221 |
|     | Propylene glycol | PC-31 | 300 | 40 | 7.52E-03 | 3.88E-03 | 0.28  | 0.209 |
|     | Castor oil       | PC-17 | 150 | 40 | 8.47E-02 | 1.16E-01 | 0.19  | 0.157 |
|     | Glycerol         | PC-17 | 300 | 40 | 5.67E-03 | 4.04E-03 | 0.21  | 0.221 |
|     | Castor oil       | PC-41 | 150 | 40 | 9.25E-02 | 1.16E-01 | 0.17  | 0.156 |
|     | Castor oil       | PC-41 | 200 | 40 | 7.98E-02 | 1.16E-01 | 0.11  | 0.221 |
|     | Castor oil       | PC-17 | 100 | 40 | 1.43E-01 | 1.16E-01 | 0.39  | 0.166 |
|     | Castor oil       | PC-17 | 200 | 40 | 1.24E-01 | 1.16E-01 | 0.17  | 0.331 |
|     | Castor oil       | PC-17 | 200 | 40 | 1.34E-01 | 1.16E-01 | 0.18  | 0.166 |

**Table S2.** The solubility of the API within various pharmaceutical grade excipients.

| Excipient                    | 3TC<br>solubility<br>(mg/mL) | ABC Solubility<br>(mg/mL) | RAL potassium<br>Solubility<br>(mg/mL) | DTG sodium<br>solubility<br>(mg/mL) |
|------------------------------|------------------------------|---------------------------|----------------------------------------|-------------------------------------|
| Castor Oil                   | 0.37 ± 0.001                 | 9.44 ± 1.46               | 0.061 ± 0.008                          | 0.08 ± 0.01                         |
| Cottonseed Oil               | 0.004 ± 0.003                | 0.837 ± 0.62              | 0.006 ± 0.001                          | 0.06 ± 0.02                         |
| Ethyl Oleate                 | 0.004 ± 0.001                | 0.066 ± 0.003             | 0.004 ± 0.001                          | 0.04 ± 0.03                         |
| Glycerol                     | 121.08 ± 19.0                | 27.50 ± 13.87             | 30.61 ± 2.48                           | 3.57 ± 0.002                        |
| Oleic Acid                   | 1.13 ± 0.001                 | 52.68 ± 1.35              | 0.20 ± 0.009                           | 2.48 ± 0.22                         |
| PEG <sub>300</sub>           | 72.98 ± 0.31                 | 72.46 ± 4.31              | 56.9 ± 3.00                            | 1.75 ± 0.11                         |
| PEG <sub>400</sub>           | 55.16 ± 0.19                 | 75.84 ± 0.72              | 33.6 ± 1.96                            | 0.95 ± 0.05                         |
| PEG <sub>600</sub>           | 41.14 ± 0.94                 | 73.00 ± 4.50              | 18.6 ± 1.37                            | 0.61 ± 0.03                         |
| PEG <sub>40</sub> Castor Oil | 8.13 ± 0.004                 | 21.85 ± 0.70              | 6.16 ± 0.012                           | 1.91 ± 0.15                         |
| Polysorbate 80               | 6.83 ± 0.77                  | 22.65 ± 0.87              | 2.10 ± 0.26                            | 1.34 ± 0.63                         |
| Propylene Glycol             | 0.02 ± 0.008                 | 71.56 ± 0.16              | 0.004 ± 0.001                          | 0.02 ± 0.002                        |
| Sesame Oil                   | 0.004 ± 0.003                | 0.149 ± 0.01              | 0.008 ± 0.003                          | 0.03 ± 0.01                         |
